# Supplementary material for: Differentiation of Anti-NMDAR Encephalitis and Autoimmune Limbic Encephalitis Using Histogram Analysis based on Multiparametric MRI
Source: Research Square preprint supplement (doi:10.21203/rs.3.rs-8504405/v1), 2026-01-19
Supplement: Supplementary file 1 [file 36b3767844576d0dbd7f5222.docx]

**Supplementary Table S1** MRI Parameters.

| **Parameter** | **Philips 1.5T** | | | **GE 1.5T** | | |
| --- | --- | --- | --- | --- | --- | --- |
| T2WI | T2WI | DWI | T2WI | FLAIR | DWI |
| Repetition time（msec） | 3700 | 7000 | 2500 | 4500 | 7500 | 3900 |
| Echo time（msec） | 100 | 120 | 95 | 110 | 120 | 90 |
| Slice thickness（mm） | 6.0 | 6.0 | 6.0 | 6.0 | 6.0 | 6.0 |
| Slice gap（mm） | 2.0 | 2.0 | 2.0 | 2.0 | 2.0 | 2.0 |
| Matrix | 512×512 | 384×384 | 256×256 | 512×512 | 512×512 | 256×256 |
| Field of view（mm2） | 228×228 | 228×228 | 230×230 | 240×240 | 240×240 | 240×240 |

**Supplementary Table S2** Comparison of histograms characteristics of bilateral hippocampus derived from different MRI sequences between the Anti-NMDAR encephalitis group and the ALE group.

|  | Parameters | Anti-NMDAR encephalitis（n=76） | ALE（n=59） | *p-value* |
| --- | --- | --- | --- | --- |
| FLAIR | Min | 0.682（0.510，0.901） | 0.591（0.427，0.799） | 0.039* |
| Max | 1.930（1.657，2.496） | 1.942（1.718，2.462） | 0.894 |
| Mean | 1.330（1.110，1.733） | 1.367（1.169，1.564） | 0.654 |
| StDev | 0.173（0.155，0.226） | 0.195（0.173，0.263） | 0.013* |
| Variance | 0.030（0.024，0.051） | 0.038（0.030，0.069） | 0.013* |
| CoefOfVar | 0.131（0.112，0.158） | 0.153（0.133，0.176） | 0.001* |
| Skewness | ‘-0.173（-0.422，-0.030） | ‘-0.178（-0.413，0.017） | 0.370 |
| Kurtosis | 0.125（-0.079，0.803） | 0.049（-0.229，0.673） | 0.094 |
| Entropy (nats) | 4.039（3.951，4.115） | 4.086（3.995，4.142） | 0.112 |
| Perc.01 | 0.943（0.694，1.177） | 0.874（0.739，1.000） | 0.231 |
| Perc.05 | 1.069（0.814，1.380） | 1.021（0.869，1.195） | 0.342 |
| Perc.10 | 1.129（0.884，1.455） | 1.090（0.923，1.273） | 0.389 |
| Perc.25 | 1.231（0.993，1.601） | 1.230（1.039，1.387） | 0.492 |
| Perc.50 | 1.335（1.108，1.737） | 1.373（1.170，1.584） | 0.626 |
| Perc.75 | 1.466（1.219，1.871） | 1.486（1.303，1.755） | 0.856 |
| Perc.90 | 1.606（1.309，2.030） | 1.580（1.410，1.969） | 1.000 |
| Perc.95 | 1.655（1.363，2.138） | 1.640（1.464，2.092） | 0.929 |
| Perc.99 | 1.741（1.468，2.282） | 1.798（1.550，2.196） | 0.831 |
| T2WI | Min | 0.410（0.283，0.559） | 0.422（0.255，0.486） | 0.345 |
| Max | 1.964（1.844，2.252） | 2.067（1.792，2.653） | 0.153 |
| Mean | 1.029（0.886，1.156） | 1.005（0.834，1.102） | 0.397 |
| StDev | 0.221（0.200，0.247） | 0.244（0.210，0.283） | 0.043* |
| Variance | 0.049（0.040，0.061） | 0.060（0.044，0.080） | 0.043* |
| CoefOfVar | 0.227（0.189，0.271） | 0.243（0.216，0.293） | 0.038* |
| Skewness | 0.382（0.277，0.642） | 0.444（0.121，0.908） | 0.443 |
| Kurtosis | 0.392（-0.059，0.974） | 0.220（-0.221，1.807） | 0.532 |
| Entropy (nats) | 4.045（3.977，4.114） | 4.064（3.793，4.161） | 0.635 |
| Perc.01 | 0.590±0.201 | 0.532±0.184 | 0.086 |
| Perc.05 | 0.693±0.206 | 0.634±0.186 | 0.089 |
| Perc.10 | 0.756±0.208 | 0.702±0.190 | 0.124 |
| Perc.25 | 0.881±0.210 | 0.836±0.197 | 0.211 |
| Perc.50 | 1.021（0.867，1.152） | 0.994（0.817，1.073） | 0.399 |
| Perc.75 | 1.154（1.024，1.299） | 1.146（0.981，1.256） | 0.483 |
| Perc.90 | 1.312（1.183，1.469） | 1.296（1.137，1.444） | 0.604 |
| Perc.95 | 1.419（1.289，1.608） | 1.397（1.246，1.623） | 0.790 |
| Perc.99 | 1.643（1.462，1.879） | 1.681（1.456，1.911） | 0.591 |
| ADC | Min | 0.512（0.481，0.596） | 0.495（0.444，0.539） | 0.013* |
| Max | 1.234（1.085，1.308） | 1.225（1.099，1.414） | 0.591 |
| Mean | 0.808（0.734，0.897） | 0.777（0.730，0.866） | 0.285 |
| StDev | 0.102（0.087，0.120） | 0.107（0.087，0.128） | 0.483 |
| Variance | 8.952（6.648，13.105） | 10.207（5.770，13.982） | 0.807 |
| CoefOfVar | 0.125（0.111，0.141） | 0.134（0.110，0.163） | 0.189 |
| Skewness | 0.622（0.485，0.869） | 0.633（0.409，0.955） | 0.877 |
| Kurtosis | 0.692（0.291，1.207） | 0.673（0.252，1.533） | 0.582 |
| Entropy (nats) | 4.068（3.989，4.120） | 4.011（3.921，4.114） | 0.026* |
| Perc.01 | 0.592（0.551，0.675） | 0.571（0.539，0.625） | 0.053 |
| Perc.05 | 0.646（0.606，0.732） | 0.622（0.600，0.691） | 0.122 |
| Perc.10 | 0.674（0.631，0.762） | 0.652（0.627，0.731） | 0.135 |
| Perc.25 | 0.713（0.673，0.817） | 0.695（0.670，0.785） | 0.168 |
| Perc.50 | 0.787（0.724，0.876） | 0.760（0.716，0.865） | 0.228 |
| Perc.75 | 0.872（0.793，0.958） | 0.839（0.781，0.929） | 0.275 |
| Perc.90 | 0.952（0.861，1.046） | 0.929（0.844，1.025） | 0.345 |
| Perc.95 | 1.011（0.905，1.096） | 0.983（0.884，1.096） | 0.451 |
| Perc.99 | 1.128（1.001，1.204） | 1.100（0.980，1.195） | 0.744 |

**Supplementary Table S3** Comparison of histograms characteristics of the left hippocampus derived from different MRI sequences between the Anti-NMDAR encephalitis group and the ALE group.

|  | Parameters | Anti-NMDAR encephalitis（n=76） | ALE（n=59） | *p-value* |
| --- | --- | --- | --- | --- |
| FLAIR | Min | 0.741（0.545，0.942） | 0.645（0.506，0.851） | 0.090 |
| Max | 1.826（1.606，2.325） | 1.871（1.678，2.321） | 0.831 |
| Mean | 1.379（1.086，1.705） | 1.351（1.165，1.590） | 0.567 |
| StDev | 0.174（0.152，0.205） | 0.188（0.169，0.230） | 0.040* |
| Variance | 0.030（0.023，0.042） | 0.035（0.029，0.053） | 0.041* |
| CoefOfVar | 0.133±0.033 | 0.150±0.034 | 0.003* |
| Skewness | ‘-0.294±0.324 | ‘-0.272±0.303 | 0.690 |
| Kurtosis | 0.203（-0.123，0.557） | ‘-0.051（-0.335，0.336） | 0.016* |
| Entropy (nats) | 4.096（4.006，4.174） | 4.145（4.062，4.211） | 0.021* |
| Perc.01 | 0.939（0.695，1.156） | 0.892（0.714，1.018） | 0.291 |
| Perc.05 | 1.075（0.825，1.350） | 1.021（0.851，1.211） | 0.297 |
| Perc.10 | 1.162（0.882，1.441） | 1.080（0.927，1.284） | 0.287 |
| Perc.25 | 1.270（0.979，1.594） | 1.205（1.038，1.423） | 0.414 |
| Perc.50 | 1.380（1.100，1.704） | 1.356（1.169，1.597） | 0.549 |
| Perc.75 | 1.490（1.215，1.873） | 1.465（1.293，1.745） | 0.794 |
| Perc.90 | 1.580（1.315，1.956） | 1.574（1.397，1.869） | 0.863 |
| Perc.95 | 1.643（1.366，2.016） | 1.639（1.450，1.927） | 0.922 |
| Perc.99 | 1.742（1.463，2.109） | 1.740（1.539，2.075） | 0.933 |
| T2WI | Min | 0.450（0.335，0.603） | 0.422（0.278，0.515） | 0.109 |
| Max | 1.873（1.740，2.053） | 1.940（1.644，2.486） | 0.303 |
| Mean | 1.012（0.893，1.180） | 0.995（0.822，1.097） | 0.314 |
| StDev | 0.219（0.200，0.248） | 0.238（0.199，0.267） | 0.080 |
| Variance | 0.048（0.040，0.061） | 0.058（0.040，0.074） | 0.037* |
| CoefOfVar | 0.219（0.186，0.263） | 0.244（0.211，0.285） | 0.016* |
| Skewness | 0.422（0.195，0.629） | 0.340（0.005，0.672） | 0.375 |
| Kurtosis | 0.211（-0.092，0.845） | 0.092（-0.409，2.048） | 0.703 |
| Entropy (nats) | 4.112（4.040，4.163） | 4.129（3.863，4.229） | 0.887 |
| Perc.01 | 0.591（0.440，0.720） | 0.562（0.388，0.645） | 0.098 |
| Perc.05 | 0.671（0.537，0.842） | 0.657（0.470，0.732） | 0.122 |
| Perc.10 | 0.745（0.599，0.911） | 0.719（0.540，0.809） | 0.186 |
| Perc.25 | 0.888±0.210 | 0.840±0.202 | 0.186 |
| Perc.50 | 1.010（0.869，1.180） | 0.995（0.806，1.086） | 0.481 |
| Perc.75 | 1.150（1.024，1.330） | 1.155（0.963，1.239） | 0.564 |
| Perc.90 | 1.307（1.190，1.470） | 1.298（1.140，1.445） | 0.645 |
| Perc.95 | 1.424（1.274，1.580） | 1.393（1.236，1.539） | 0.641 |
| Perc.99 | 1.629（1.451，1.798） | 1.595（1.423，1.802） | 0.982 |
| ADC | Min | 0.545(0.505，0.642) | 0.516（0.471，0.567） | 0.002* |
| Max | 1.201(1.057，1.287) | 1.156（1.017，1.366） | 0.840 |
| Mean | 0.816(0.743，0.905) | 0.778（0.733，0.868） | 0.129 |
| StDev | 0.101(0.087，0.113) | 0.097（0.077，0.127） | 0.943 |
| Variance | 10.158(7.476，12.716) | 9.411（5.914，16.126） | 0.947 |
| CoefOfVar | 0.121(0.106，0.136) | 0.126（0.103，0.161） | 0.338 |
| Skewness | 0.634(0.404，0.747) | 0.558（0.224，0.853） | 0.310 |
| Kurtosis | 0.605(0.193，0.934) | 0.557（0.095，1.609） | 0.409 |
| Entropy (nats) | 4.103(4.031，4.156) | 4.047（3.934，4.148） | 0.002* |
| Perc.01 | 0.603(0.552，0.688) | 0.580（0.544，0.638） | 0.018* |
| Perc.05 | 0.658(0.609，0.733) | 0.645（0.611，0.708） | 0.163 |
| Perc.10 | 0.688(0.635，0.765) | 0.667（0.637，0.744） | 0.130 |
| Perc.25 | 0.737(0.680，0.816) | 0.700（0.674，0.795） | 0.117 |
| Perc.50 | 0.804(0.738，0.879) | 0.764（0.720，0.860） | 0.107 |
| Perc.75 | 0.880(0.797，0.959) | 0.825（0.780，0.927） | 0.137 |
| Perc.90 | 0.962(0.861，1.052) | 0.923（0.832，1.039） | 0.205 |
| Perc.95 | 1.020(0.910，1.108) | 0.963（0.869，1.097） | 0.237 |
| Perc.99 | 1.123(1.003，1.209) | 1.075（0.953，1.217） | 0.364 |

**Supplementary Table S4** Comparison of histograms characteristics of the right hippocampus derived from different MRI sequences between the Anti-NMDAR encephalitis group and the ALE group .

|  | Parameters | Anti-NMDAR encephalitis（n=76） | ALE（n=59） | *p-value* |
| --- | --- | --- | --- | --- |
| FLAIR | Min | 0.729（0.548，0.995） | 0.683（0.472，0.884） | 0.090 |
| Max | 1.868（1.594，2.390） | 1.842（1.685，2.362） | 0.831 |
| Mean | 1.352（1.083，1.784） | 1.364（1.165，1.606） | 0.567 |
| StDev | 0.169（0.147，0.206） | 0.188（0.164，0.255） | 0.040* |
| Variance | 0.028（0.022，0.042） | 0.035（0.027，0.065） | 0.041* |
| CoefOfVar | 0.130±0.028 | 0.153±0.037 | 0.003* |
| Skewness | ‘-0.141（-0.347，0.041） | ‘-0.140（-0.380，0.062） | 0.690 |
| Kurtosis | 0.117（-0.108，0.431） | 0.051（-0.281，0.239） | 0.016* |
| Entropy (nats) | 4.080±0.125 | 4.123±0.128 | 0.021* |
| Perc.01 | 0.951（0.706，1.257） | 0.857（0.745，1.031） | 0.291 |
| Perc.05 | 1.060（0.814，1.386） | 1.007（0.884，1.214） | 0.297 |
| Perc.10 | 1.113（0.882，1.481） | 1.099（0.925，1.299） | 0.287 |
| Perc.25 | 1.232（0.981，1.632） | 1.245（1.025，1.491） | 0.414 |
| Perc.50 | 1.361（1.080，1.790） | 1.363（1.162，1.627） | 0.549 |
| Perc.75 | 1.477（1.184，1.941） | 1.473（1.285，1.822） | 0.794 |
| Perc.90 | 1.571（1.275，2.061） | 1.578（1.389，1.981） | 0.863 |
| Perc.95 | 1.625（1.324，2.131） | 1.620（1.437，2.060） | 0.922 |
| Perc.99 | 1.724（1.428，2.265） | 1.716（1.544，2.206） | 0.933 |
| T2WI | Min | 0.462±0.197 | 0.430±0.185 | 0.346 |
| Max | 1.880（1.742，2.055） | 2.001（1.716，2.441） | 0.133 |
| Mean | 0.999（0.871，1.148） | 0.993（0.837，1.109） | 0.567 |
| StDev | 0.213（0.196，0.242） | 0.225（0.203，0.284） | 0.024* |
| Variance | 0.045（0.038，0.059） | 0.051（0.041，0.081） | 0.023* |
| CoefOfVar | 0.221±0.058 | 0.250±0.065 | 0.008* |
| Skewness | 0.309（0.099，0.514） | 0.425（0.147，0.918） | 0.075 |
| Kurtosis | 0.213（-0.098，0.730） | 0.295（-0.259，2.076） | 0.404 |
| Entropy (nats) | 4.087（4.022，4.162） | 4.057（3.904，4.182） | 0.299 |
| Perc.01 | 0.597±0.215 | 0.540±0.185 | 0.103 |
| Perc.05 | 0.654（0.536，0.814 | 0.634（0.502，0.752） | 0.221 |
| Perc.10 | 0.717（0.590，0.889） | 0.706（0.569，0.811） | 0.252 |
| Perc.25 | 0.842（0.714，1.011） | 0.834（0.686，0.934） | 0.404 |
| Perc.50 | 0.993（0.863，1.148） | 0.984（0.797，1.068） | 0.470 |
| Perc.75 | 1.126（1.007，1.299） | 1.133（0.953，1.261） | 0.540 |
| Perc.90 | 1.288（1.140，1.428） | 1.274（1.124，1.467） | 0.887 |
| Perc.95 | 1.371（1.239，1.539） | 1.375（1.221，1.589） | 0.943 |
| Perc.99 | 1.596（1.436，1.764） | 1.615（1.421，1.898） | 0.358 |
| ADC | Min | 0.541(0.497，0.614) | 0.517(0.486，0.597) | 0.092 |
| Max | 1.155(1.055，1.272) | 1.168(1.070，1.326) | 0.486 |
| Mean | 0.783(0.726，0.885) | 0.775(0.727，0.861) | 0.459 |
| StDev | 0.097(0.082，0.109) | 0.106(0.082，0.128) | 0.106 |
| Variance | 9.428(6.707，11.947) | 11.202(6.665，16.384) | 0.108 |
| CoefOfVar | 0.121(0.109，0.135) | 0.131(0.109，0.153) | 0.034* |
| Skewness | 0.578(0.391，0.824) | 0.528(0.333，0.940) | 0.933 |
| Kurtosis | 0.445(0.122，1.079) | 0.506(0.064，1.591) | 0.760 |
| Entropy (nats) | 4.099(4.006，4.154) | 4.075(3.968，4.163) | 0.224 |
| Perc.01 | 0.593(0.550，0.686) | 0.569(0.545，0.650) | 0.087 |
| Perc.05 | 0.629(0.603，0.744) | 0.624(0.598，0.696) | 0.091 |
| Perc.10 | 0.665(0.627，0.771) | 0.650(0.625，0.733) | 0.144 |
| Perc.25 | 0.708(0.672，0.817) | 0.699(0.665，0.783) | 0.211 |
| Perc.50 | 0.777(0.719，0.873) | 0.768(0.714，0.844) | 0.321 |
| Perc.75 | 0.831(0.754，0.931) | 0.770(0.715，0.853) | 0.000* |
| Perc.90 | 0.927(0.846，1.031) | 0.928(0.844，0.999) | 0.654 |
| Perc.95 | 0.975(0.892，1.078) | 0.986(0.902，1.050) | 0.868 |
| Perc.99 | 1.072(0.978，1.195) | 1.099(0.987，1.195) | 0.711 |

**Supplementary Table S5**  Logistic regressionanalysis of different MRIhistograms models of the left hippocampus betweentheAnti-NMDAR encephalitis group and the ALE group.

| Different models |  | Univariable LR | | Multivariable LR | |
| --- | --- | --- | --- | --- | --- |
| OR (95% CI) | *p-value* | OR (95% CI) | *p-value* |
| FLAIR | StDev  Variance  CoefOfVar  Kurtosis  Entropy (nats) | 0.005(0.000-2.352)  0.000(0.000-23.329)  0.000(0.000-0.009)  1.494(0.861-2.593)  0.092(0.005-1.565) | 0.092  0.135  0.005*  0.153  0.099 | NA  NA  0.000(0.000-0.009)  NA  NA | NA  NA  0.005*  NA  NA |
| T2WI | Variance  CoefOfVar | 0.000(0.000-3.473)  0.001(0.000-0.297) | 0.087  0.016* | NA  0.001(0.000-0.297) | NA  0.016* |
| ADC | Min  Entropy (nats)  Perc.01 | 982.674(13.310-72551.532)  303.245(11.246-8176.891)  398.713(4.200-37849.239) | 0.002*  0.001*  0.010* | 247.455(3.678-16648.376)  143.580(4.825-4272.131)  0.200(0.000-125966.865) | 0.010*  0.004*  0.813 |

**Supplementary Table S6**  Logistic regressionanalysis of different MRIhistograms models for the right hippocampus betweenthe Anti-NMDAR encephalitis group and theALE group .

| Different models |  | Univariable LR | | Multivariable LR | |
| --- | --- | --- | --- | --- | --- |
| OR (95% CI) | *p-value* | OR (95% CI) | *p-value* |
| FLAIR | StDev  Variance  CoefOfVar | 0.002（0.000-0.629）  0.000（0.000-1.136）  0.000（0.000-0.000） | 0.034*  0.052  0.000* | 0.120(0.000-71.990)  NA  0.000(0.000-0.001) | 0.515  NA  0.000* |
| T2WI | StDev  Variance  CoefOfVar | 0.000（0.000-0.247）  0.000（0.000-0.090）  0.000（0.000-0.160） | 0.018*  0.020*  0.010* | 2.597（0.162-41.699）  0.000(0.000-97.845)  0.000(0.000-0.158) | 0.500  0.186  0.010* |
| ADC | CoefOfVar  Perc.75 | 0.000（0.000-0.471）  453.960（10.885-18932.124） | 0.036*  0.001* | 0.000(0.000-0.065)  821.839(17.031-39657.566) | 0.017*  0.001* |

**Supplementary Table S7** Performance of different MRIhistograms models for the left and right hippocampus.

| Model | AUC (95% CI) | Sensitivity | Specificity | Youden index | Cut-off values |
| --- | --- | --- | --- | --- | --- |
| FLAIR-L-hist model | 0.653(0.560-0.746) | 0.579 | 0.678 | 0.257 | 0.585 |
| T2WI-L-hist model | 0.621(0.526-0.715) | 0.605 | 0.610 | 0.215 | 0.567 |
| ADC-L-hist model | 0.726(0.636-0.817) | 0.908 | 0.525 | 0.433 | 0.448 |
| mp-MRI-L-hist model | 0.757(0.672-0.842) | 0.789 | 0.661 | 0.450 | 0.526 |
| FLAIR-R-hist model | 0.678(0.587-0.769) | 0.553 | 0.712 | 0.265 | 0.592 |
| T2WI-R-hist model | 0.631(0.537-0.725) | 0.395 | 0.864 | 0.259 | 0.644 |
| ADC-R-hist model | 0.717(0.629-0.805) | 0.803 | 0.542 | 0.345 | 0.480 |
| mp-MRI-R-hist model | 0.746(0.663-0.829) | 0.789 | 0.610 | 0.399 | 0.514 |

AUC: area under the curve; CI: confidence interval.

**Supplementary Fig. S1** Receiver operating characteristic curves of various MRI histogram models for the left (A) and right hippocampus (B).


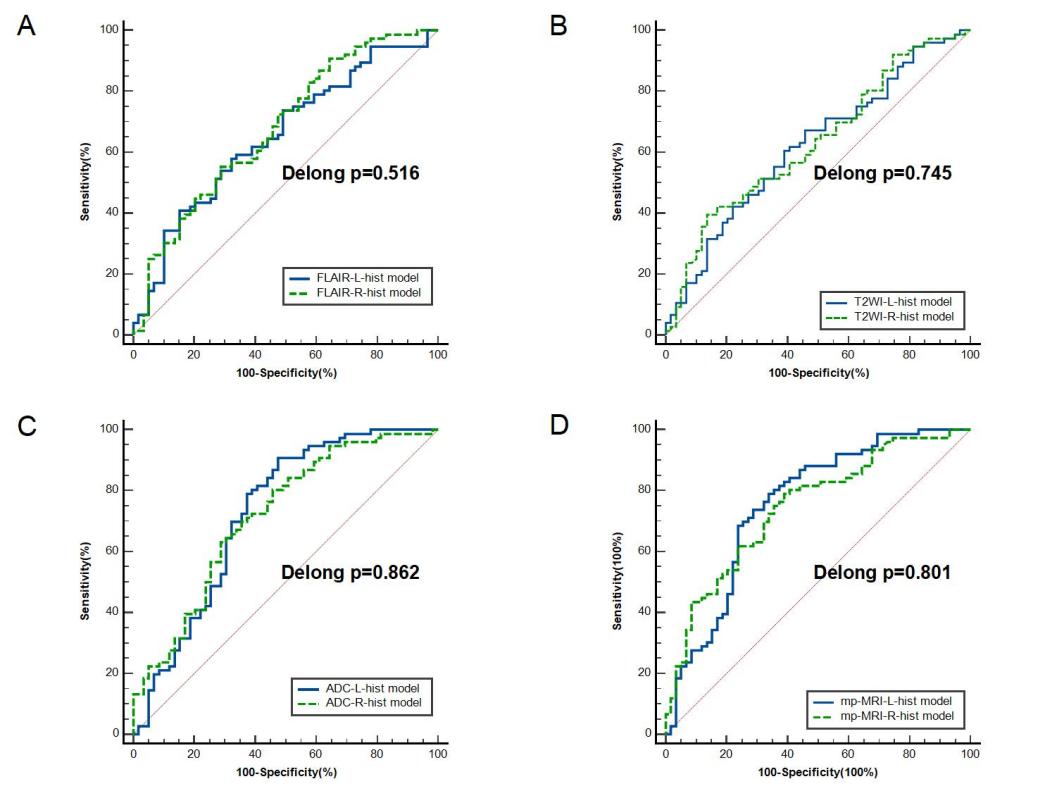


**Supplementary Fig. S2** Receiver operating characteristic curves and DeLong Test Results of Bilateral Hippocampal Histogram Models across MRI Sequences.
